# Supplementary material for: Cell-specific spatial profiling of targeted protein expression to characterize the impact of intracortical microelectrode implantation on neuronal health
Source: Royal Society of Chemistry journal article supplement (doi:10.1039/d4tb01628a), 2024-01-01
Supplement: d4tb01628a1.xlsx [file d4tb01628a1.xlsx]

## Sheet: ReadMe
Sheet 1: NeuN Count	Page shows the NeuN counts (counted manually) and the area for each ring collected in Lindsey's and Sydney's proteomics study (collected in 2022) (see example below). Then a t-test was performed to determine if the NeuN counts per area were the same between different time points.
	Example:	WT 4WK2 L3S4		< Sample Name as shown on GeoMx
		1	2	< ROI number on instrument
		78	70	<NeuN manually counted in inner ring
		73891.5	50019.6	< Summed area of inner NeuN, GFAP, Else regions
		1055.6	1399.45	< #NeuN/area inner ring (converted from um to mm)
		146	168	"
		125700	101765	"
		1161.49	1650.86	All remaining columns are repeated for middle and outer rings
		158	293	"
		116402	153743	"
		1357.37	1905.78	"
Sheet 2: Proteomics	This sheet shows the values for the proteomics analysis, see example below
		Example:	4WK NeuN Inner vs CTRNeuN Inner					< Comparison
			Protein	Log2FC	Pval	FDRq	-log10(padjusted)	<Log2FC [log2(experimental average/control average)], Pval (unadjusted), FDRq (adjusted pval), -log10(adjusted pval) for volcano plot
			MAP2	0.264952	0.401422	0.523043	0.281462
			MBP	-0.800242	0.0140746	0.0527798	1.27753
			NfL	2.63451	0.673129	0.69634	0.157178
			OLIG2	8.05926	0.241568	0.402614	0.395111
			SYP	1.47785	0.238648	0.402614	0.395111

## Sheet: NeuN Count
NSCTR Baseline ROI	1	2	3	4	5	6	7	8	9	10	11	12	13	14	15	16
Total Count:	407	413	465	695	314	316	385	271	385	380	328	307	243	310	283	383
Total Area (square microns):	246513	247434	245198	244522	247930	243790	245773	248275	246540	243852	245738	204919	215935	215093	256855	232594			Average	Standard Deviation			NeuN Counts per Square Millimeter:					T-Tests:
NeuN Count per Square Millimeter, Entire ROI:	1651.03	1669.13	1896.43	2842.28	1266.49	1296.2	1566.49	1091.53	1561.61	1558.32	1334.75	1498.15	1125.34	1441.24	1101.79	1646.65		NSCTR Animals:	1534.21	417.715			NSCTR	1534.21					Inner	Middle	Outer
																								Inner	Middle	Outer		4WK	5.74563e-05	0.278606	0.271049
4WK Animal:	WT 4WK L3S4	WT 4WK5 L3S2		WT 4WK1 L3S5		WT 4WK2 L3S5		WT 4WK L2S6		WT 4WK1 L2S6		WT 4WK2 L3S4		WT 4WK5 L3S4									4WK	859.631	1370.02	1386.43		8WK	0.0201509	0.968082	0.966674
ROI:	1	1	2	1	2	1	2	1	2	1	2	1	2	1	2			4WK Animals:	Average	Standard Deviation			8WK	1123.93	1540.01	1528.3
NeuN Count per Square Millimeter, Inner:	539.174	708.751	500.444	1723.56	1197.27	1074.99	1037.79	546.954	723.713	479.473	840.16	1055.6	1399.45	523.608	543.522			NeuN Count per Square Millimeter, Inner:	859.631	377.658
NeuN Count per Square Millimeter, Middle:	1184.34	881.466	999.587	1784.13	1668.46	1438.19	1598.25	945.899	1018.27	1533.36	2399.75	1161.49	1650.86	1097.97	1188.23			NeuN Count per Square Millimeter, Middle:	1370.02	409.505
NeuN Count per Square Millimeter, Outer:	1312.16	1076.67	947.847	1648.56	1659.48	1559.95	1548.04	1000.89	916.088	1556.41	1703.15	1357.37	1905.78	1289.12	1314.92			NeuN Count per Square Millimeter, Outer:	1386.43	302.08
8WK Animal:	WT 8WK1 L1S9	WT 8WK2 L1S5		WT 8WK1 L3S7		WT 8WK5 L3S2				WT 8WK1 L4S4 (NCPP)	WT 8WK2 L2S1		WT 8WK3 L3S3	WT 8WK4 L2S1
ROI:	1	1	2	1	2	1	2	3	4	1	1	2	1	1	2	3		8WK Animals:	Average	Standard Deviation
NeuN Count per Square Millimeter, Inner:	566.54	626.707	1303.13	2168.92	1816.24	573.326	1842.9	781.263	774.86	772.865	1740.2	1472.69	800.877	877.442	871.18	993.739		NeuN Count per Square Millimeter, Inner:	1123.93	522.258
NeuN Count per Square Millimeter Middle:	2250.71	1711.57	1754.4	1953.06	1754.21	1280.05	2255.19	1199.03	1383.25	1587.29	1429.69	1656.01	1129.28	1044.52	995.763	1256.16		NeuN Count per Square Millimeter, Middle:	1540.01	394.607
NeuN Count per Square Millimeter Outer:	1816.52	1977.84	1899.78	1872.28	1894.1	1120.37	1975.01	1532.17	1371.57	1718.47	1603.42	1536.94	1088.21	934.78	960.835	1150.44		NeuN Count per Square Millimeter, Outer:	1528.3	375.806

## Sheet: Proteomics
		4WK NeuN Inner vs CTRNeuN Inner						8WK NeuN Inner vs CTRNeuN Inner
		Protein	Log2FC	Pval	FDRq	-log10(padjusted)		Protein	Log2FC	Pval	FDRq	-log10(padjusted)
		MAP2	0.264952	0.401422	0.523043	0.281462		MAP2	-0.673098	0.000344466	0.00147429	2.83142
		MBP	-0.800242	0.0140746	0.0527798	1.27753		MBP	-1.90484	1.48738e-05	0.0002235	3.65072
		NfL	2.63451	0.673129	0.69634	0.157178		NfL	-0.851141	0.01169	0.039	1.40894
		OLIG2	8.05926	0.241568	0.402614	0.395111		OLIG2	-0.392503	0.0541099	0.104143	0.982369
		SYP	1.47785	0.238648	0.402614	0.395111		SYP	-0.208141	0.189988	0.316647	0.499425
		4WK NeuN Middle vs CTRNeuN Middle						8WK NeuN Middle vs CTRNeuN Middle
		Protein	Log2FC	Pval	FDRq	-log10(padjusted)		Protein	Log2FC	Pval	FDRq	-log10(padjusted)
		MAP2	0.183167	0.206647	0.365294	0.437357		MAP2	-0.590557	0.00130958	0.00382857	2.41696
		MBP	-0.761703	0.0281952	0.0957888	1.01869		MBP	-1.99273	3.66282e-06	7.065e-05	4.15089
		NfL	2.93441	0.92633	0.92633	0.0332341		NfL	-0.999132	0.000195696	0.00084	3.07572
		OLIG2	8.34081	0.222291	0.366852	0.435509		OLIG2	-0.641069	6.49877e-05	0.000352	3.45346
		SYP	0.198047	0.18923	0.354806	0.450009		SYP	-0.513675	0.00187242	0.00431538	2.36498
		4WK NeuN Outer vs CTRNeuN Outer						8WK NeuN Outer vs CTRNeuN Outer
		Protein	Log2FC	Pval	FDRq	-log10(padjusted)		Protein	Log2FC	Pval	FDRq	-log10(padjusted)
		MAP2	0.797565	0.94979	0.94979	0.0223725		MAP2	-0.642612	0.000405277	0.00135	2.86967
		MBP	-0.497222	0.0135313	0.084317	1.07408		MBP	-2.00609	1.21511e-06	1.83e-05	4.73755
		NfL	2.86247	0.719712	0.810704	0.091138		NfL	-0.869281	0.00015806	0.000677143	3.16932
		OLIG2	7.67009	0.540873	0.649048	0.187723		OLIG2	-0.719092	5.70328e-06	3.42e-05	4.46597
		SYP	1.41341	0.259775	0.446671	0.350012		SYP	-0.593698	0.000229193	0.00085875	3.06613
